# Supplementary material for: Measuring Alphavirus Fidelity Using Non-Infectious Virus Particles
Source: PubMed Central journal article supplement (PMC7291308; doi:10.3390/v12050546), 2020-05-15
Supplement: viruses-12-00546-s001.pdf [file viruses-12-00546-s001.pdf]

Supplemental Table 1. Average reads per sample [for Analysis A](#).

| Mutant                       | Replicate | Mean depth positive strand | Mean depth negative strand | Mean depth total |
|------------------------------|-----------|----------------------------|----------------------------|------------------|
| TC-83 E3Δ56-59               | 1         | 432.778621                 | 433.5137                   | 866.292321       |
|                              | 2         | 515.829581                 | 515.142932                 | 1030.97251       |
|                              | 3         | 399.427836                 | 400.338394                 | 799.76623        |
| TC-83 E3Δ56-59<br>nsP4-G14R  | 1         | 3856.64337                 | 3856.05593                 | 7712.6993        |
|                              | 2         | 4014.3541                  | 4018.6911                  | 8033.0452        |
|                              | 3         | 4088.32757                 | 4101.9548                  | 8190.28237       |
| TC-83 E3Δ56-59<br>nsP4-A96T  | 1         | 2276.95314                 | 2276.05515                 | 4553.00829       |
|                              | 2         | 2234.36763                 | 2238.01117                 | 4472.3788        |
|                              | 3         | 2678.11353                 | 2686.5644                  | 5364.67792       |
| TC-83 E3Δ56-59<br>nsP4-C488Y | 1         | 2144.78517                 | 2143.66536                 | 4288.45052       |
|                              | 2         | 2470.95942                 | 2473.58281                 | 4946.62103       |
|                              | 3         | 2469.0164                  | 2479.46518                 | 4948.48159       |

Supplemental table 2. Most frequent mutations for each sample [for Analysis A](#).

Positive strand mutations

VEEV TC-83 E3del56-59 #1

| Rank | Mutation | Frequency |
|------|----------|-----------|
| 1    | C5540A   | 0.0648968 |
| 2    | A7653C   | 0.0561224 |
| 3    | C5553A   | 0.0343137 |
| 4    | A580C    | 0.0338983 |
| 5    | A780C    | 0.030303  |
| 6    | A582C    | 0.0263158 |
| 7    | A5719C   | 0.0254777 |
| 8    | A1105C   | 0.0251397 |
| 9    | A7270C   | 0.0230263 |
| 10   | G5528A   | 0.022792  |

VEEV TC-83 E3del56-59 #2

| Rank | Mutation | Frequency |
|------|----------|-----------|
| 1    | C5540A   | 0.0946502 |
| 2    | A7653C   | 0.035533  |
| 3    | A7648C   | 0.0349345 |
| 4    | A5794G   | 0.0342679 |
| 5    | A3990C   | 0.031746  |
| 6    | C402G    | 0.0304569 |
| 7    | C5555A   | 0.0294985 |
| 8    | A2165C   | 0.0277778 |
| 9    | A585C    | 0.025641  |
| 10   | A6754C   | 0.0252294 |

VEEV TC-83 E3del56-59 nsP4-G14R #1

| Rank | Mutation | Frequency |
|------|----------|-----------|
| 1    | C5540A   | 0.136379  |
| 2    | C401G    | 0.0429338 |
| 3    | A2634DEL | 0.0339496 |
| 4    | A7653C   | 0.0269509 |
| 5    | C5555A   | 0.0227137 |
| 6    | G5528T/A | 0.022294  |
| 7    | A10001C  | 0.0191424 |
| 8    | C837A    | 0.0163872 |
| 9    | A580C    | 0.0163366 |
| 10   | A27C     | 0.0161744 |

VEEV TC-83 E3del56-59 nsP4-G14R #2

| Rank | Mutation | Frequency |
|------|----------|-----------|
| 1    | C5540A   | 0.136545  |
| 2    | C5555A   | 0.0341928 |
| 3    | A7653C   | 0.026936  |
| 4    | G5528T/A | 0.0232843 |
| 5    | A2634DEL | 0.0232558 |
| 6    | A10001C  | 0.0197775 |
| 7    | C837A    | 0.0192238 |
| 8    | A780C    | 0.0163588 |
| 9    | A418C    | 0.0163011 |
| 10   | C5553A   | 0.015544  |

VEEV TC-83 E3del56-59 nsP4-A96T #1

| Rank | Mutation | Frequency |
|------|----------|-----------|
| 1    | C5540A   | 0.149942  |
| 2    | C5555A   | 0.0441478 |
| 3    | A2634DEL | 0.0382202 |
| 4    | G5528T/A | 0.0296496 |
| 5    | T11433C  | 0.0220994 |
| 6    | A7653C   | 0.0208034 |
| 7    | A10001C  | 0.0184971 |
| 8    | C11435A  | 0.0166667 |
| 9    | A585C    | 0.0156617 |
| 10   | C5553A   | 0.0153302 |

VEEV TC-83 E3del56-59 nsP4-A96T #2

| Rank | Mutation | Frequency |
|------|----------|-----------|
| 1    | C5540A   | 0.104903  |
| 2    | C5555A   | 0.0387755 |
| 3    | A7653C   | 0.0303502 |
| 4    | G5528T/A | 0.0236842 |
| 5    | A585C    | 0.0192469 |
| 6    | A7270C   | 0.0190647 |
| 7    | A418C    | 0.0161111 |
| 8    | A582C    | 0.0156682 |
| 9    | A9824C   | 0.0155039 |
| 10   | A5199C   | 0.0147839 |

| VEEV TC-83 E3del56-59 nsP4-C488Y #1 |          |           | VEEV TC-83 E3del56-59 nsP4-C488Y #2 |          |           |
|-------------------------------------|----------|-----------|-------------------------------------|----------|-----------|
| Rank                                | Mutation | Frequency | Rank                                | Mutation | Frequency |
| 1                                   | C5540A   | 0.152502  | 1                                   | C5540A   | 0.127165  |
| 2                                   | C5555A   | 0.04102   | 2                                   | C5555A   | 0.0314524 |
| 3                                   | A2634DEL | 0.0352723 | 3                                   | A7653C   | 0.0310296 |
| 4                                   | A7653C   | 0.0235664 | 4                                   | C837A    | 0.0223979 |
| 5                                   | C837A    | 0.02      | 5                                   | A10001C  | 0.0222965 |
| 6                                   | A10001C  | 0.019802  | 6                                   | A2634DEL | 0.0200472 |
| 7                                   | G5528T/A | 0.0184226 | 7                                   | G5528T/A | 0.0187557 |
| 8                                   | A5199C   | 0.0143266 | 8                                   | A418C    | 0.017301  |
| 9                                   | A9824C   | 0.0127051 | 9                                   | C5553A   | 0.0158562 |
| 10                                  | A585C    | 0.0126812 | 10                                  | A27C     | 0.0152964 |

#### VEEV TC-83 E3del transcript

| Rank | Mutation                  | Frequency |
|------|---------------------------|-----------|
| 1    | C5540A/G/T                | 0.179036  |
| 2    | A2634DEL/insT/T/G/C       | 0.0893827 |
| 3    | G5528A/T/C                | 0.0593408 |
| 4    | C5555A/G/T                | 0.033924  |
| 5    | T9957insG/insT/A/C/G/insA | 0.0243958 |
| 6    | T5510A/G/C                | 0.0236875 |
| 7    | A7653C/G/T                | 0.0232678 |
| 8    | T2507insT/insG/A/C/G      | 0.0200434 |
| 9    | C837A/T/G                 | 0.0176365 |
| 10   | A10001C/G/T               | 0.0167738 |

#### VEEV TC-83 E3del nsP4-G14R transcript

| Rank | Mutation                  | Frequency |
|------|---------------------------|-----------|
| 1    | C5540A/GT/insT            | 0.180665  |
| 2    | A2634DEL/insT/G/T/insC/C  | 0.0450685 |
| 3    | G5528A/T/C                | 0.0385345 |
| 4    | C5555A/G/T                | 0.0312315 |
| 5    | T2507insT/insG/A/C/G/insA | 0.0309076 |
| 6    | C837A/T/G                 | 0.0173858 |
| 7    | T11397insG/A/insT/C       | 0.0158089 |
| 8    | T5510A/G/C                | 0.0155256 |
| 9    | A7653C/G/T                | 0.0133255 |
| 10   | C5553A/G/T                | 0.0126876 |

VEEV TC-83 E3del nsP4-A96T transcript

| Rank | Mutation                | Frequency |
|------|-------------------------|-----------|
| 1    | C5540A/G/T              | 0.211054  |
| 2    | A2634DEL/insT/T/G/C     | 0.086318  |
| 3    | G5528A/T/C              | 0.0478007 |
| 4    | C5555A/G/T              | 0.0307119 |
| 5    | T2507insT/insG/A/C/G    | 0.0295492 |
| 6    | A7653C/G/T              | 0.0233614 |
| 7    | T5510A/G/C              | 0.019889  |
| 8    | A418C/G/T/DEL           | 0.0189843 |
| 9    | T11397insG/insT/A/C     | 0.0179663 |
| 10   | A585C/G/T/DEL/insG/insT | 0.0175888 |

VEEV TC-83 E3del nsP4-C488Y transcript

| Rank | Mutation                  | Frequency |
|------|---------------------------|-----------|
| 1    | C5540A/G/T/insA           | 0.179951  |
| 2    | A2634DEL/insT/T/G/C/insA  | 0.0777254 |
| 3    | G5528A/T/C                | 0.039005  |
| 4    | C5555A/G/T                | 0.0313867 |
| 5    | T2507insT/insG/A/C/G/insA | 0.0286837 |
| 6    | T11397/insG/insT/A/C      | 0.0197568 |
| 7    | C837A/T/G                 | 0.0173624 |
| 8    | A7653C/G/T/insC/insG      | 0.0164076 |
| 9    | T5510A/G/C                | 0.0153463 |
| 10   | C5553A/G/T                | 0.0145342 |

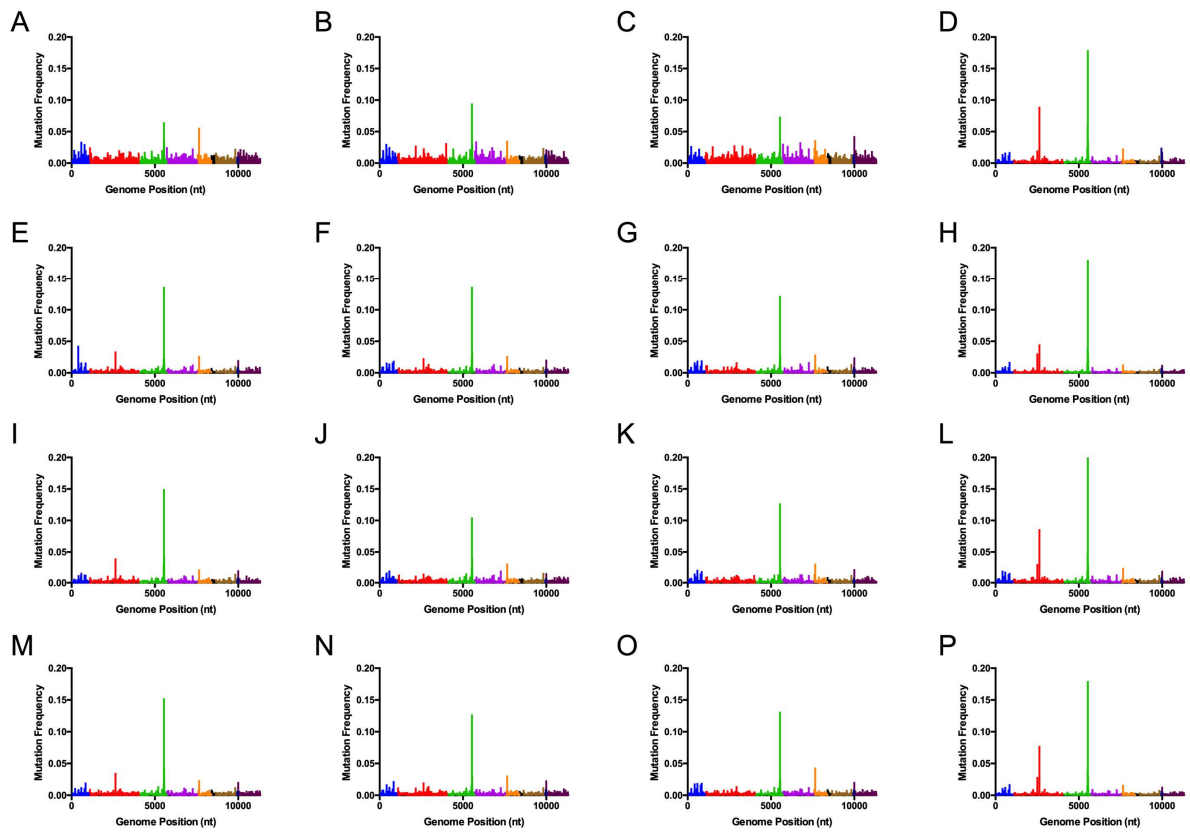

Supplemental Figure 1. Mutation frequency of VEEV TC-83 E3 56-59 mutants at coding regions across the genome. VEEV TC-83 E3 56-59 replicates 1, 2, 3 and transcript(A-D), VEEV TC-83 E3 56-59 nsP4-G14R replicates 1, 2, 3 and transcript (E-H), VEEV TC-83 E3 56-59 nsP4-A96T replicates 1, 2, 3 and transcript (I-L), and VEEV TC-83 E3 56-59 nsP4-C488Y replicates 1, 2, 3 and transcript (M-P). Panels have been analyzed using Analysis A. Graphs show a representative of each specific mutant. Blue=nsP1, red=nsP2, green=nsP3, purple=nsP4, orange=capsid, black=E3, gold=E2, navy blue=6k, maroon=E1.
